## Correction for: Ubiquitin-specific protease 4 promotes metastasis of hepatocellular carcinoma by increasing TGF- $\beta$ signaling-induced epithelial-mesenchymal transition

Chan Qiu<sup>1,\*</sup>, Yan Liu<sup>2,\*</sup>, Ying Mei<sup>3</sup>, Min Zou<sup>1</sup>, Zhibo Zhao<sup>3</sup>, Mingxin Ye<sup>4</sup>, Xiaoling Wu<sup>1</sup>

<sup>1</sup>Department of Gastroenterology, the Second Affiliated Hospital of Chongqing Medical University, Chongqing, 400010, P.R. China

<sup>2</sup>Department of Gastroenterology, the Fifth People's Hospital of Chengdu, Chengdu, Sichuan, 611130, P.R. China

<sup>3</sup>Department of Hepatobiliary Surgery, the Second Affiliated Hospital of Chongqing Medical University, Chongqing, 400010, P.R. China

<sup>4</sup>Department of Hepatobiliary Surgery, the Affiliated Hospital of Southwest Medical University, Lu zhou, Sichuan, 646000, P.R. China

\*Equal contribution

Correspondence to: Mingxin Ye, Xiaoling Wu; email: [Mingxin\\_Y@163.com](mailto:Mingxin_Y@163.com), [wuxiaoling@cqmu.edu.cn](mailto:wuxiaoling@cqmu.edu.cn)

Original article: [Aging \(Albany NY\) 2018; 10: 2783-2799.](#)

PMCID: PMC6224254 PMID: 30335615 doi: 10.18632/aging.101587

**This article has been corrected:** The authors submitted the wrong Figure 5 (panel F) from other experiment group in this study and requested to replace it. The correct Figure 5 is provided below. The authors declare that this correction does not change the results or conclusions of this paper. The authors sincerely apologize for this error.

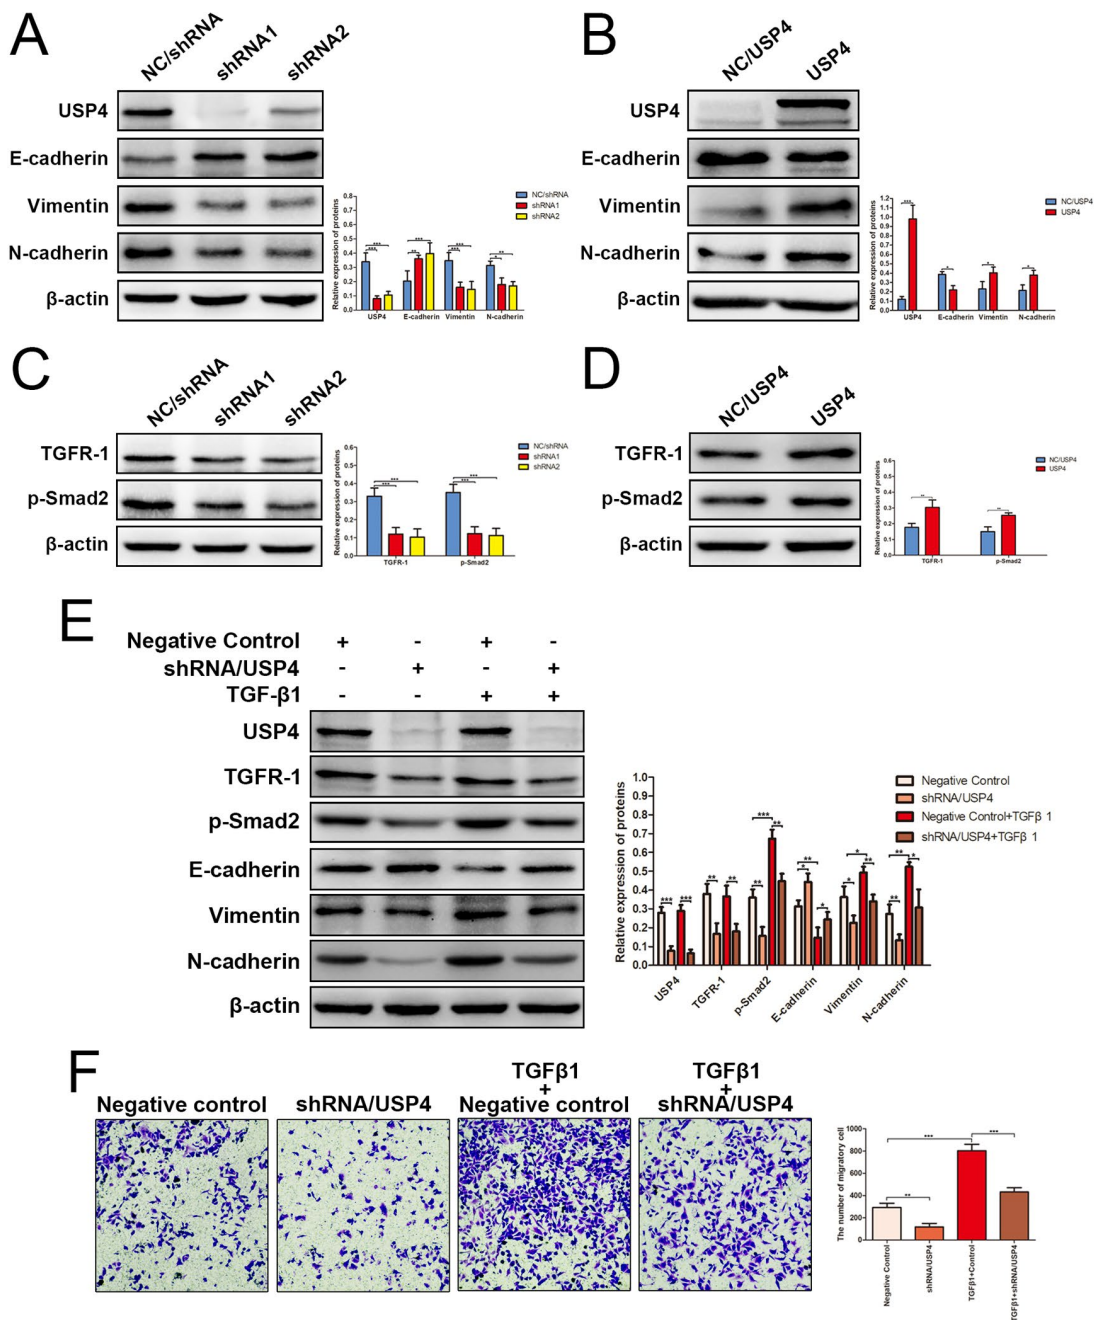

**Figure 5. USP4 activated TGF- $\beta$  signaling pathway to induce epithelial-to-mesenchymal transition (EMT).** (A) The expression of EMT markers in SK-Hep1- shRNA/USP4 cells and in negative control cells (\*  $P < 0.05$ , \*\*  $P < 0.01$ , \*\*\*  $P < 0.001$ ). (B) The expression of EMT markers in HuH7-USP4 cells and in negative control cells (\*  $P < 0.05$ , \*\*\*  $P < 0.001$ ). (C) The expression of TGFR-1 and p-Smad2 in SK-Hep1- shRNA/USP4 cells and in negative control cells (\*\*\*  $P < 0.001$ ). (D) The expression of TGFR-1 and p-Smad2 in HuH7-USP4 cells and in negative control cells (\*  $P < 0.05$ , \*\*  $P < 0.01$ ). (E) The expression of TGFR-1, p-Smad2 and EMT markers in SK-Hep1- shRNA/USP4 cells or in negative control cells, with TGF- $\beta$ 1 (10ng/mL) treatment for 24h or without (\*  $P < 0.05$ , \*\*  $P < 0.01$ , \*\*\*  $P < 0.001$ ). (F) The migration ability of SK-Hep1-shRNA/USP4 cells or negative control cells, with TGF- $\beta$ 1 treatment or without, detected by Transwell migration assay (\*\*  $P < 0.01$ , \*\*\*  $P < 0.001$ ).
